# Supplementary material
Source: MDPI journal article supplement (https://www.mdpi.com/2071-1050/15/16/12599)
Supplement: s1 [file s1 › sustainability-2484192-supplementary.pdf]

**Supplementary Table 1.** List of the 46 data input sources from Mexico used by the GBD to estimate the burden of asthma.

| Title                                                                                                                                                   | Time period covered | Geography                | Data type             | Secondary data type                         |
|---------------------------------------------------------------------------------------------------------------------------------------------------------|---------------------|--------------------------|-----------------------|---------------------------------------------|
| Association between obesity and asthma in preschool Mexican children                                                                                    | 01/2005 to 12/2005  | Mexico                   | Scientific literature |                                             |
| Asthma in late adolescents of Western Mexico: prevalence and associated factors                                                                         | 01/2009 to 12/2009  | Mexico                   | Scientific literature |                                             |
| Global variation in the prevalence and severity of asthma symptoms: phase three of the International Study of Asthma and Allergies in Childhood (ISAAC) | 01/2000 to 12/2003  | Global                   | Scientific literature |                                             |
| Association between obesity and asthma in preschool Mexican children                                                                                    | 01/2005 to 12/2005  | Mexico                   | Scientific literature |                                             |
| Asthma in late adolescents of Western Mexico: prevalence and associated factors                                                                         | 01/2009 to 12/2009  | Mexico                   | Scientific literature |                                             |
| Global variation in the prevalence and severity of asthma symptoms: phase three of the International Study of Asthma and Allergies in Childhood (ISAAC) | 01/2000 to 12/2003  | Global                   | Scientific literature |                                             |
| Mexico - Mexico City Survey on Health, Well-Being, and Aging in Latin America and the Caribbean 1999-2000                                               | 10/1999 to 12/2000  | Mexico, Distrito Federal | Survey                | Household                                   |
| Mexico Family Life Survey 2002                                                                                                                          | 01/2002 to 12/2002  | Mexico                   | Survey                | Nationally and Subnationally representative |
| Mexico Family Life Survey 2005-2006                                                                                                                     | 01/2005 to 12/2006  | Mexico                   | Survey                | Nationally and Subnationally representative |
| Mexico Family Life Survey 2008-2013                                                                                                                     | 11/2008 to 10/2013  | Mexico                   | Survey                | Nationally and Subnationally representative |
| Mexico Health and Aging Study 2012                                                                                                                      | 10/2012 to 11/2012  | Mexico                   | Survey                | Nationally and Subnationally representative |
| Mexico Household Income and Expenditure Survey 2002                                                                                                     | 08/2002 to 11/2002  | Mexico                   | Survey                | Nationally and Subnationally representative |
| Mexico Morbidity Yearbook 2012                                                                                                                          | 01/2012 to 12/2012  | Mexico                   | Epi surveillance      | Subnationally representative                |

|                                                                               |                    |                 |                     |                                                       |
|-------------------------------------------------------------------------------|--------------------|-----------------|---------------------|-------------------------------------------------------|
| Mexico Morbidity Yearbook 2013                                                | 01/2013 to 12/2013 | Mexico          | Epi surveillance    | Subnationally representative                          |
| Mexico Morbidity Yearbook 2014                                                | 01/2014 to 12/2014 | Mexico          | Epi surveillance    | Subnationally representative                          |
| Mexico National Health Survey 1994                                            | 01/1994 to 12/1994 | Mexico          | Survey              | Cross-sectional, Household, Individual, Interview     |
| Mexico National Health Survey 1999-2000                                       | 09/1999 to 03/2000 | Mexico          | Survey              | Nationally and Subnationally representative           |
| Mexico National Nutrition Survey 1998-1999                                    | 10/1998 to 03/1999 | Mexico          | Survey              | Nationally representative, Urban-rural representative |
| Mexico National Performance Evaluation Survey 2002-2003                       | 11/2002 to 04/2003 | Mexico          | Survey              | Nationally and Subnationally representative           |
| Mexico National School Health Survey 2008                                     | 09/2007 to 06/2008 | Mexico          | Survey              | Nationally and Subnationally representative           |
| Mexico National Survey of Health and Nutrition (ENSANUT) 2018-2019            | 07/2018 to 06/2019 | Mexico          | Survey              | Nationally and Subnationally representative           |
| Mexico National Survey of Health and Nutrition 2005-2006                      | 10/2005 to 05/2006 | Mexico          | Survey              | Household, Subnationally representative               |
| Mexico National Survey of Health and Nutrition 2011-2012                      | 06/2011 to 12/2012 | Mexico          | Survey              | Nationally and Subnationally representative           |
| Mexico Salud Mesoamérica Initiative Baseline Census and Household Survey 2013 | 01/2013 to 06/2013 | Mexico, Chiapas | Survey              | Cross-sectional, Household, Individual, Interview     |
| Mexico Secretariat of Health Hospital Discharges 2011                         | 01/2011 to 12/2011 | Mexico          | Administrative data | Discharge, Inpatient, Subnationally representative    |
| Mexico Secretariat of Health Hospital Discharges 2014                         | 01/2014 to 12/2014 | Mexico          | Administrative data | Discharge, Inpatient, Subnationally representative    |
| Mexico SUIVE Epidemiology Bulletin Week 1, 2017 - No. 1 Vol. 34               | 01/2010 to 01/2017 | Mexico          | Epi surveillance    | Subnationally representative                          |
| Mexico SUIVE Epidemiology Bulletin Week 2, 2017 - No. 2, Vol. 34              | 01/1981 to 01/2017 | Mexico          | Epi surveillance    | Subnationally representative                          |

|                                                              |                    |        |                  |                                             |
|--------------------------------------------------------------|--------------------|--------|------------------|---------------------------------------------|
| Mexico SUIVE Epidemiology Bulletin Week 52 1995              | 01/1995 to 12/1995 | Mexico | Epi surveillance | Subnationally representative                |
| Mexico SUIVE Epidemiology Bulletin Week 52 1996              | 01/1996 to 12/1996 | Mexico | Epi surveillance | Subnationally representative                |
| Mexico SUIVE Epidemiology Bulletin Week 53 1997              | 01/1997 to 12/1997 | Mexico | Epi surveillance | Subnationally representative                |
| Mexico SUIVE Epidemiology Bulletin Week 52 1998              | 01/1998 to 12/1998 | Mexico | Epi surveillance | Subnationally representative                |
| Mexico SUIVE Epidemiology Bulletin Week 52 1999              | 01/1999 to 12/1999 | Mexico | Epi surveillance | Subnationally representative                |
| Mexico SUIVE Epidemiology Bulletin Week 52 2000              | 01/2000 to 12/2000 | Mexico | Epi surveillance | Subnationally representative                |
| Mexico SUIVE Epidemiology Bulletin Week 52 2013              | 01/2013 to 12/2013 | Mexico | Epi surveillance | Subnationally representative                |
| Mexico SUIVE Epidemiology Bulletin Week 53, 2014             | 01/2014 to 12/2014 | Mexico | Epi surveillance | Subnationally representative                |
| Mexico SUIVE Epidemiology Bulletin Week 52, 2015             | 01/2015 to 12/2015 | Mexico | Epi surveillance | Subnationally representative                |
| Mexico SUIVE Epidemiology Bulletin Week 52, 2016             | 01/2016 to 12/2016 | Mexico | Epi surveillance | Subnationally representative                |
| Mexico SUIVE Epidemiology Weekly Bulletin 2017               | 01/2016 to 12/2017 | Mexico | Epi surveillance | Subnationally representative                |
| Mexico SUIVE Epidemiology Weekly Bulletin 2018               | 01/2009 to 12/2018 | Mexico | Epi surveillance | Subnationally representative                |
| Mexico SUIVE Epidemiology Weekly Bulletin 2019               | 01/2013 to 12/2019 | Mexico | Epi surveillance | Subnationally representative                |
| Mexico SUIVE Epidemiology Weekly Bulletin 2020               | 01/2015 to 12/2020 | Mexico | Epi surveillance | Subnationally representative                |
| Mexico WHO Study on Global AGEing and Adult Health 2009-2010 | 01/2009 to 12/2010 | Mexico | Survey           | Nationally and Subnationally representative |

|                                                                                                                                 |                    |              |                       |                                             |
|---------------------------------------------------------------------------------------------------------------------------------|--------------------|--------------|-----------------------|---------------------------------------------|
| Mexico World Health Survey 2002-2003                                                                                            | 11/2002 to 08/2003 | Mexico       | Survey                | Household, Individual,                      |
| Premise General Population COVID-19 Health Services Disruption Survey 2020                                                      | 2020-07-01         | Global       | Survey                | Cross-sectional, Individual                 |
| Premise General Population COVID-19 Health Services Disruption Survey 2020                                                      | 2020-07-01         | Global       | Survey                | Cross-sectional, Individual                 |
| Premise General Population COVID-19 Health Services Disruption Survey 2021                                                      | 05/2021 to 06/2021 | Global       | Survey                | Cross-sectional, Individual                 |
| Regional variation in asthma symptom prevalence in Latin American children                                                      | 01/2001 to 12/2003 | The Americas | Scientific literature |                                             |
| Worldwide variations in the prevalence of asthma symptoms: the International Study of Asthma and Allergies in Childhood (ISAAC) | 01/1986 to 12/1996 | Global       | Scientific literature |                                             |
| Mexico Vital Registration – Deaths                                                                                              | 1980 to 2017       | Mexico       | Survey                | Nationally and Subnationally representative |

**Supplementary Table 2.** Health state and disability weights defined by the GBD [1].

| <b>Asthma severity (% of total, 95% uncertainty interval)</b> | <b>Health state definition</b>                                                                                                                                                      | <b>Disability weight</b> |
|---------------------------------------------------------------|-------------------------------------------------------------------------------------------------------------------------------------------------------------------------------------|--------------------------|
| Asymptomatic (36.2, 35.0 to 37.3)                             |                                                                                                                                                                                     |                          |
| Controlled (19.9, 13.6 to 27.8)                               | A person that experiences cough and wheezing once a month but without interfering with daily activities                                                                             | 0.015 (0.007 to 0.026)   |
| Partially controlled (20.6, 15.1 to 25.8)                     | A person that experiences cough and wheezing once a week and has some difficulty with daily activities                                                                              | 0.036 (0.022 to 0.055)   |
| Uncontrolled (23.3, 18.7 to 30.3)                             | A person that experiences cough, wheezing, and shortness of breath more than twice in a week, which causes difficulties with daily activities and wakes the person during the night | 0.133 (0.086 to 0.192)   |

**Supplementary Table 3.** Age-standardized estimates per 100,000 people (with 95% UI) of prevalence, incidence, mortality and DALYs due to asthma in 2019.

| Measure                   | Age-standardized rate per 100,000 people (95% UI) |                              |                        |                  |
|---------------------------|---------------------------------------------------|------------------------------|------------------------|------------------|
|                           | Prevalence                                        | Incidence                    | DALYs                  | Mortality        |
| Global                    | 3,415.5 (2,898.9 to 4,066.2)                      | 504.3 (400.6 to 633.3)       | 273.6 (216.7 to 343.4) | 5.8 (4.6 to 7.0) |
| High-income North America | 9,848.1 (8,624.3 to 11,312.1)                     | 1,474.1 (1,188.9 to 1,810.7) | 413.0 (282.5 to 584.4) | 0.8 (0.7 to 0.9) |
| Southern Latin America    | 6,450.2 (5,427.8 to 7,800.4)                      | 742.3 (592.4 to 935.5)       | 275.8 (188.2 to 399.4) | 1.1 (0.9 to 1.2) |
| Tropical Latin America    | 4,907.3 (3,771.5 to 6,383.3)                      | 916.1 (645.5 to 1,218.1)     | 227.3 (154.5 to 339.9) | 1.3 (1.1 to 1.5) |
| Andean Latin America      | 4,215.4 (3,152.4 to 5,621.4)                      | 760.3 (565.3 to 1,022.7)     | 192.3 (124.9 to 291.9) | 0.9 (0.7 to 1.2) |
| Caribbean                 | 6,072.6 (5,048.5 to 7,345.1)                      | 938.4 (741.7 to 1,179.0)     | 422.8 (315.7 to 553.5) | 4.5 (3.4 to 5.8) |
| Central Latin America     | 3,244.4 (2,546.2 to 4,160.4)                      | 583.3 (427.8 to 775.7)       | 166.1 (116.3 to 237.5) | 1.4 (1.2 to 1.7) |
| Mexico                    | 2,765.1 (2,128.8 to 3,626.0)                      | 523.8 (370.2 to 712.4)       | 142.9 (100.0 to 206.6) | 1.5 (1.2 to 1.8) |

**Supplementary Table 4.** Estimates (counts with 95% UI) of prevalence, incidence, mortality and DALYs due to asthma in Mexico by age group in 2019.

| Age group     | Prevalence                     | Incidence                    | Mortality      | DALYs                     |
|---------------|--------------------------------|------------------------------|----------------|---------------------------|
| <b>1-4</b>    | 428,338 (244,811 to 683,550)   | 206,823 (120,919 to 326,983) | 34 (3 to 58)   | 20,295 (11,571 to 34,442) |
| <b>5-9</b>    | 723,419 (452,895 to 1,166,406) | 148,023 (74,191 to 265,416)  | 7 (3 to 10)    | 29,916 (16,275 to 52,729) |
| <b>10-14</b>  | 564,805 (348,405 to 885,009)   | 87,796 (39,137 to 143,312)   | 10 (3 to 12)   | 23,553 (13,027 to 40,110) |
| <b>15-19</b>  | 367,593 (229,086 to 563,674)   | 50,138 (28,679 to 78,080)    | 12 (3 to 15)   | 15,631 (8,716 to 25,976)  |
| <b>20-24</b>  | 223,506 (141,648 to 332,259)   | 28,153 (11,868 to 50,964)    | 18 (3 to 22)   | 10,112 (5,817 to 16,235)  |
| <b>25-29</b>  | 173,735 (110,603 to 263,407)   | 18,488 (10,470 to 28,699)    | 22 (3 to 27)   | 8,250 (5,053 to 13,138)   |
| <b>30-34</b>  | 160,316 (107,075 to 234,010)   | 12,376 (5,794 to 21,027)     | 26 (3 to 32)   | 7,792 (5,023 to 11,712)   |
| <b>35-39</b>  | 143,634 (99,693 to 207,459)    | 9,496 (4,844 to 16,329)      | 33 (3 to 41)   | 7,330 (4,955 to 10,802)   |
| <b>40-44</b>  | 122,755 (86,777 to 171,114)    | 7,778 (3,396 to 14,545)      | 47 (3 to 60)   | 6,980 (4,827 to 9,691)    |
| <b>45-49</b>  | 104,242 (75,518 to 145,131)    | 6,969 (3,106 to 12,614)      | 58 (3 to 73)   | 6,443 (4,565 to 8,807)    |
| <b>50-54</b>  | 83,814 (60,253 to 116,427)     | 5,957 (2,754 to 10,007)      | 70 (3 to 89)   | 5,809 (4,276 to 7,834)    |
| <b>55-59</b>  | 66,838 (48,329 to 90,479)      | 5,059 (2,233 to 8,980)       | 86 (3 to 107)  | 5,308 (4,069 to 6,927)    |
| <b>60-64</b>  | 53,765 (37,566 to 73,084)      | 4,360 (2,149 to 7,378)       | 107 (3 to 133) | 4,974 (3,842 to 6,340)    |
| <b>65-69</b>  | 40,283 (29,711 to 51,972)      | 3,491 (1,564 to 6,589)       | 127 (3 to 155) | 4,445 (3,568 to 5,491)    |
| <b>70-74</b>  | 32,533 (23,224 to 44,857)      | 3,069 (1,493 to 5,399)       | 164 (3 to 196) | 4,308 (3,501 to 5,205)    |
| <b>75-79</b>  | 24,479 (17,995 to 32,797)      | 2,509 (1,333 to 4,077)       | 196 (3 to 233) | 3,837 (3,141 to 4,558)    |
| <b>80-84</b>  | 17,684 (12,990 to 24,109)      | 2,310 (1,466 to 3,545)       | 221 (3 to 263) | 3,177 (2,571 to 3,752)    |
| <b>85-89</b>  | 12,477 (9,453 to 16,557)       | 1,880 (1,302 to 2,602)       | 208 (3 to 249) | 2,270 (1,791 to 2,691)    |
| <b>90-94</b>  | 6,585 (4,876 to 8,825)         | 972 (586 to 1,430)           | 136 (3 to 165) | 1,156 (887 to 1,387)      |
| <b>&gt;95</b> | 2,555 (1,726 to 3,666)         | 354 (185 to 540)             | 71 (3 to 87)   | 455 (344 to 552)          |

DALYs = Disability-adjusted lived years

**Supplementary Table 5.** Prevalence, incidence, mortality and DALYs rate (with 95% UI) due to asthma per 100,000 people in Mexico by age group in 2019.

| Age group     | Prevalence              | Incidence              | Mortality                | DALYs            |
|---------------|-------------------------|------------------------|--------------------------|------------------|
| <b>1-4</b>    | 5,102 (2,916 to 8,142)  | 2,463 (1,440 to 3,895) | 0.41 (0.29 to 0.70)      | 242 (138 to 410) |
| <b>5-9</b>    | 6,687 (4,186 to 10,782) | 1,368 (686 to 2,453)   | 0.07 (0.05 to 0.10)      | 277 (150 to 487) |
| <b>10-14</b>  | 5,133 (3,166 to 8,043)  | 798 (356 to 1,302)     | 0.09 (0.07 to 0.11)      | 214 (118 to 365) |
| <b>15-19</b>  | 3,363 (2,096 to 5,157)  | 459 (262 to 714)       | 0.11 (0.09 to 0.14)      | 143 (80 to 238)  |
| <b>20-24</b>  | 2,089 (1,324 to 3,105)  | 263 (111 to 476)       | 0.17 (0.13 to 0.21)      | 94 (54 to 152)   |
| <b>25-29</b>  | 1,718 (1,094 to 2,605)  | 183 (104 to 284)       | 0.22 (0.17 to 0.27)      | 82 (50 to 130)   |
| <b>30-34</b>  | 1,686 (1,126 to 2,461)  | 130 (61 to 221)        | 0.28 (0.21 to 0.34)      | 82 (53 to 123)   |
| <b>35-39</b>  | 1,609 (1,116 to 2,323)  | 106 (54 to 183)        | 0.37 (0.28 to 0.46)      | 82 (55 to 121)   |
| <b>40-44</b>  | 1,467 (1,037 to 2,045)  | 93 (41 to 174)         | 0.56 (0.43 to 0.71)      | 83 (58 to 116)   |
| <b>45-49</b>  | 1,347 (976 to 1,875)    | 90 (40 to 163)         | 0.75 (0.58 to 0.94)      | 83 (59 to 114)   |
| <b>50-54</b>  | 1,260 (906 to 1,751)    | 90 (41 to 150)         | 1.06 (0.81 to 1.34)      | 87 (64 to 118)   |
| <b>55-59</b>  | 1,211 (876 to 1,639)    | 92 (40 to 163)         | 1.56 (1.18 to 1.93)      | 96 (74 to 125)   |
| <b>60-64</b>  | 1,193 (834 to 1,622)    | 97 (48 to 164)         | 2.37 (1.84 to 2.95)      | 110 (85 to 141)  |
| <b>65-69</b>  | 1,213 (895 to 1,565)    | 105 (47 to 198)        | 3.82 (2.95 to 4.67)      | 134 (107 to 165) |
| <b>70-74</b>  | 1,269 (906 to 1,749)    | 120 (58 to 211)        | 6.39 (5.07 to 7.65)      | 168 (137 to 203) |
| <b>75-79</b>  | 1,371 (1,008 to 1,837)  | 141 (75 to 228)        | 11.00 (8.79 to 13.03)    | 215 (176 to 255) |
| <b>80-84</b>  | 1,577 (1,159 to 2,150)  | 206 (131 to 316)       | 19.69 (15.71 to 23.46)   | 283 (229 to 335) |
| <b>85-89</b>  | 2,086 (1,581 to 2,769)  | 314 (218 to 435)       | 34.86 (26.86 to 41.72)   | 380 (300 to 450) |
| <b>90-94</b>  | 2,837 (2,101 to 3,803)  | 419 (252 to 616)       | 58.66 (43.35 to 71.03)   | 498 (382 to 598) |
| <b>&gt;95</b> | 3,723 (2,515 to 5,343)  | 516 (270 to 786)       | 103.75 (75.10 to 126.59) | 662 (501 to 804) |

DALYs = Disability-adjusted lived years

**Supplementary Table 6.** Estimates (counts with 95% UI) of prevalence, incidence, mortality, and DALYs due to asthma in men and women of all ages at the subnational level in 2019.

| State               | Prevalence                   | Incidence                  | Mortality      | DALYs                     |
|---------------------|------------------------------|----------------------------|----------------|---------------------------|
| Aguascalientes      | 39,552 (30,248 to 51,584)    | 7,139 (5,105 to 9,709)     | 13 (3 to 16)   | 1,905 (1,292 to 2,815)    |
| Baja California     | 89,895 (66,494 to 124,590)   | 16,171 (11,227 to 22,466)  | 34 (3 to 43)   | 4,475 (3,055 to 6,627)    |
| Baja California Sur | 22,624 (17,598 to 29,638)    | 3,923 (2,848 to 5,221)     | 8 (3 to 10)    | 1,097 (758 to 1,607)      |
| Campeche            | 26,738 (20,923 to 34,202)    | 4,742 (3,440 to 6,369)     | 16 (3 to 20)   | 1,420 (1,024 to 2,015)    |
| Chiapas             | 182,534 (140,349 to 239,902) | 35,008 (25,085 to 47,363)  | 90 (3 to 112)  | 9,646 (6,871 to 13,861)   |
| Chihuahua           | 99,401 (78,083 to 127,597)   | 17,438 (12,774 to 23,139)  | 53 (3 to 65)   | 5,296 (3,747 to 7,561)    |
| Coahuila            | 87,106 (67,647 to 114,809)   | 15,703 (11,314 to 21,552)  | 30 (3 to 38)   | 4,175 (2,858 to 6,222)    |
| Colima              | 21,022 (16,609 to 26,933)    | 3,622 (2,677 to 4,811)     | 12 (3 to 16)   | 1,120 (800 to 1,602)      |
| Durango             | 51,734 (40,242 to 67,383)    | 9,502 (6,814 to 12,919)    | 25 (3 to 31)   | 2,651 (1,839 to 3,843)    |
| Guanajuato          | 180,201 (140,901 to 235,132) | 32,211 (23,419 to 43,874)  | 95 (3 to 120)  | 9,369 (6,696 to 13,497)   |
| Guerrero            | 109,944 (85,730 to 142,810)  | 20,729 (14,952 to 28,419)  | 59 (3 to 73)   | 5,788 (4,091 to 8,251)    |
| Hidalgo             | 84,608 (65,886 to 109,624)   | 15,197 (10,885 to 20,388)  | 36 (3 to 44)   | 4,206 (2,908 to 6,115)    |
| Jalisco             | 210,128 (159,098 to 277,945) | 38,074 (27,237 to 51,774)  | 94 (3 to 114)  | 10,639 (7,332 to 15,513)  |
| Estado de México    | 411,104 (306,297 to 565,103) | 78,148 (54,450 to 107,696) | 133 (3 to 161) | 19,865 (13,320 to 29,752) |
| Mexico City         | 180,254 (135,839 to 242,480) | 31,548 (22,379 to 43,108)  | 72 (3 to 92)   | 8,711 (5,854 to 12,975)   |
| Michoacán           | 135,148 (105,064 to 175,809) | 24,406 (17,395 to 32,515)  | 81 (3 to 102)  | 7,169 (5,115 to 10,116)   |
| Morelos             | 50,616 (39,064 to 65,569)    | 9,109 (6,470 to 12,249)    | 27 (3 to 34)   | 2,601 (1,814 to 3,776)    |
| Nayarit             | 35,118 (27,458 to 45,495)    | 6,296 (4,537 to 8,383)     | 21 (3 to 27)   | 1,871 (1,320 to 2,667)    |
| Nuevo Leon          | 118,887 (87,905 to 163,375)  | 21,674 (15,186 to 29,669)  | 35 (3 to 44)   | 5,521 (3,644 to 8,305)    |
| Oaxaca              | 118,404 (91,317 to 154,221)  | 21,754 (15,621 to 29,205)  | 67 (3 to 84)   | 6,120 (4,327 to 8,763)    |
| Puebla              | 187,367 (144,627 to 244,713) | 34,375 (24,725 to 46,168)  | 97 (3 to 121)  | 9,711 (6,814 to 13,806)   |
| Queretaro           | 61,067 (47,352 to 79,671)    | 10,962 (7,826 to 14,564)   | 22 (3 to 28)   | 2,976 (2,059 to 4,329)    |
| Quintana Roo        | 49,239 (38,517 to 63,102)    | 8,666 (6,295 to 11,377)    | 21 (3 to 26)   | 2,490 (1,752 to 3,578)    |
| San Luis Potosi     | 79,398 (61,369 to 103,834)   | 14,314 (10,307 to 19,425)  | 40 (3 to 50)   | 4,009 (2,790 to 5,832)    |
| Sinaloa             | 83,040 (65,246 to 106,742)   | 14,462 (10,566 to 19,396)  | 48 (3 to 60)   | 4,366 (3,112 to 6,180)    |
| Sonora              | 82,365 (64,011 to 106,114)   | 14,393 (10,439 to 19,255)  | 36 (3 to 44)   | 4,126 (2,888 to 6,011)    |
| Tabasco             | 70,217 (54,283 to 91,172)    | 12,465 (9,062 to 16,707)   | 45 (3 to 57)   | 3,890 (2,801 to 5,479)    |
| Tamaulipas          | 100,191 (78,468 to 129,739)  | 17,482 (12,640 to 23,248)  | 35 (3 to 43)   | 4,790 (3,266 to 7,044)    |
| Tlaxcala            | 37,227 (28,405 to 48,861)    | 6,726 (4,805 to 8,981)     | 9 (3 to 11)    | 1,689 (1,117 to 2,508)    |
| Veracruz            | 242,689 (191,544 to 302,969) | 41,124 (30,732 to 53,940)  | 230 (3 to 284) | 14,658 (10,873 to 19,680) |
| Yucatan             | 59,166 (46,348 to 75,655)    | 10,246 (7,479 to 13,525)   | 45 (3 to 57)   | 3,257 (2,340 to 4,567)    |
| Zacatecas           | 46,372 (36,446 to 58,920)    | 8,392 (6,030 to 11,228)    | 28 (3 to 34)   | 2,434 (1,717 to 3,465)    |

DALYs = Disability-adjusted lived years

**Supplementary Table 7.** Percent change from 2010 to 2019 in estimates of prevalence, incidence, mortality, and DALYs due to asthma at the subnational level.

| State               | % change from 2010 to 2019 (95% UI) |                        |                         |                        |
|---------------------|-------------------------------------|------------------------|-------------------------|------------------------|
|                     | Prevalence                          | Incidence              | Mortality               | DALYs                  |
| Aguascalientes      | 22.48 (14.60 to 30.37)              | 18.29 (8.34 to 25.99)  | 0.13 (-19.20 to 22.87)  | 15.66 (6.55 to 24.42)  |
| Baja California     | 23.56 (14.17 to 34.61)              | 19.79 (10.52 to 29.19) | 8.20 (-13.28 to 32.22)  | 15.42 (3.48 to 26.50)  |
| Baja California Sur | 40.23 (30.79 to 49.22)              | 33.74 (25.68 to 42.05) | 38.47 (2.53 to 77.63)   | 40.02 (29.55 to 52.22) |
| Campeche            | 18.05 (11.19 to 25.66)              | 15.73 (8.20 to 23.36)  | 11.50 (-10.44 to 36.98) | 14.19 (5.42 to 23.75)  |
| Chiapas             | 25.61 (16.76 to 35.38)              | 25.00 (16.29 to 34.42) | 1.25 (-19.47 to 26.59)  | 15.97 (5.69 to 27.18)  |
| Chihuahua           | 9.44 (2.40 to 16.68)                | 5.89 (-1.37 to 12.45)  | -0.01 (-21.03 to 21.82) | 4.53 (-4.21 to 13.03)  |
| Coahuila            | 23.17 (15.35 to 31.87)              | 20.59 (12.82 to 29.92) | 3.84 (-16.39 to 26.41)  | 18.03 (8.50 to 27.41)  |
| Colima              | 21.50 (13.64 to 30.11)              | 16.77 (7.78 to 24.34)  | 22.62 (-8.25 to 58.62)  | 20.35 (9.85 to 32.36)  |
| Durango             | 13.13 (5.76 to 20.97)               | 10.77 (2.63 to 19.07)  | -11.28 (-28.40 to 9.70) | 4.68 (-4.07 to 13.41)  |
| Guanajuato          | 14.78 (8.20 to 22.34)               | 9.92 (2.99 to 17.35)   | 6.77 (-18.61 to 34.57)  | 10.53 (1.55 to 19.87)  |
| Guerrero            | 7.71 (-0.20 to 16.31)               | 4.58 (-3.62 to 11.70)  | -7.23 (-28.63 to 16.33) | -1.48 (-11.23 to 7.99) |
| Hidalgo             | 16.97 (9.18 to 25.12)               | 12.75 (5.20 to 20.68)  | 1.70 (-19.81 to 25.28)  | 10.96 (1.94 to 20.15)  |
| Jalisco             | 6.11 (-2.14 to 15.99)               | 5.18 (-2.95 to 14.40)  | -5.16 (-23.87 to 13.66) | 1.94 (-6.69 to 11.08)  |
| Estado de México    | 13.29 (4.49 to 23.04)               | 12.16 (3.82 to 21.33)  | 5.61 (-13.61 to 27.75)  | 9.29 (-0.19 to 18.90)  |
| Mexico City         | 4.12 (-3.41 to 11.61)               | 1.17 (-6.03 to 8.90)   | -3.38 (-21.95 to 18.61) | 0.87 (-6.88 to 8.94)   |
| Michoacán           | 9.23 (2.65 to 16.35)                | 6.60 (-1.22 to 13.75)  | -4.19 (-25.68 to 18.09) | 2.23 (-6.05 to 10.50)  |
| Morelos             | 5.31 (-1.70 to 12.75)               | 4.91 (-1.70 to 12.16)  | 12.19 (-12.26 to 39.10) | 4.44 (-3.48 to 12.69)  |
| Nayarit             | 16.75 (9.67 to 23.94)               | 15.07 (7.40 to 21.95)  | 7.57 (-17.65 to 35.47)  | 12.80 (3.36 to 22.51)  |
| Nuevo Leon          | 17.91 (9.91 to 27.60)               | 14.88 (6.39 to 24.49)  | 3.63 (-17.95 to 27.32)  | 13.84 (4.88 to 23.76)  |
| Oaxaca              | 10.40 (3.13 to 18.29)               | 7.44 (-0.38 to 14.93)  | -3.29 (-23.83 to 18.52) | 3.44 (-5.04 to 12.37)  |
| Puebla              | 14.29 (6.91 to 22.40)               | 10.81 (2.89 to 18.84)  | 1.54 (-18.55 to 26.26)  | 8.11 (-0.97 to 17.99)  |
| Queretaro           | 25.61 (17.55 to 34.30)              | 21.71 (13.30 to 30.23) | 13.64 (-11.12 to 39.78) | 21.50 (12.66 to 31.06) |
| Quintana Roo        | 36.21 (27.37 to 45.60)              | 32.12 (23.45 to 40.52) | 29.93 (2.80 to 63.01)   | 30.85 (20.66 to 41.69) |
| San Luis Potosi     | 13.50 (6.01 to 20.95)               | 9.13 (1.36 to 16.77)   | 4.82 (-19.92 to 31.43)  | 9.52 (0.84 to 18.02)   |
| Sinaloa             | 7.78 (0.76 to 15.60)                | 5.20 (-2.56 to 11.82)  | 10.13 (-14.46 to 37.44) | 5.62 (-3.19 to 15.26)  |
| Sonora              | 16.18 (8.60 to 24.47)               | 11.93 (4.22 to 19.76)  | -1.66 (-20.95 to 18.96) | 9.06 (-0.12 to 17.74)  |
| Tabasco             | 2.63 (-5.01 to 11.14)               | 1.98 (-5.57 to 9.22)   | 1.44 (-18.86 to 23.94)  | -0.95 (-9.59 to 8.29)  |
| Tamaulipas          | 4.11 (-3.39 to 11.90)               | 1.01 (-6.40 to 7.85)   | -0.64 (-19.79 to 20.31) | 1.47 (-6.35 to 9.56)   |
| Tlaxcala            | 22.96 (14.19 to 32.22)              | 17.96 (10.15 to 26.48) | 3.47 (-17.87 to 29.21)  | 19.02 (8.89 to 28.89)  |
| Veracruz            | 2.58 (-3.79 to 9.05)                | 0.43 (-7.01 to 7.03)   | 1.27 (-18.43 to 21.72)  | -2.52 (-11.15 to 6.84) |
| Yucatan             | 3.12 (-3.50 to 10.46)               | 2.18 (-4.50 to 9.08)   | -1.97 (-21.03 to 20.79) | 1.43 (-7.03 to 9.97)   |
| Zacatecas           | 12.65 (5.64 to 20.45)               | 9.84 (2.85 to 16.46)   | -2.94 (-25.20 to 19.08) | 6.45 (-2.55 to 15.24)  |

DALYs = Disability-adjusted lived years

## References

1. Vos T, Lim SS, Abbafati C, Abbas KM, Abbasi M, Abbasifard M, et al. Global burden of 369 diseases and injuries in 204 countries and territories, 1990–2019: a systematic analysis for the Global Burden of Disease Study 2019. *The Lancet*. 2020;396(10258):1204-1222. doi: 10.1016/s0140-6736(20)30925-9.
